# Supplementary material
Source: MDPI journal article supplement (https://www.mdpi.com/2073-445X/12/4/880)
Supplement: s1 [file s1]

## (Supplementary Material)

# Biogeophysical Effects of Land-Use and Land-Cover Changes in South Asia: An Analysis of CMIP6 Models

Juliana Freitas Santos \*, Udo Schickhoff, Shabeh ul Hasson and Jürgen Böhrer

Center for Earth System Research and Sustainability (CEN), Institute of Geography at University of Hamburg, Bundesstraße 55, 20146 Hamburg, Germany; udo.schickhoff@uni-hamburg.de (U.S.); shabeh.hasson@uni-hamburg.de (S.u.H.); juergen.boehner@uni-hamburg.de (J.B.)

\* Correspondence: juliana.freitas.santos@uni-hamburg.com; Tel.: +49-40-42838-7826

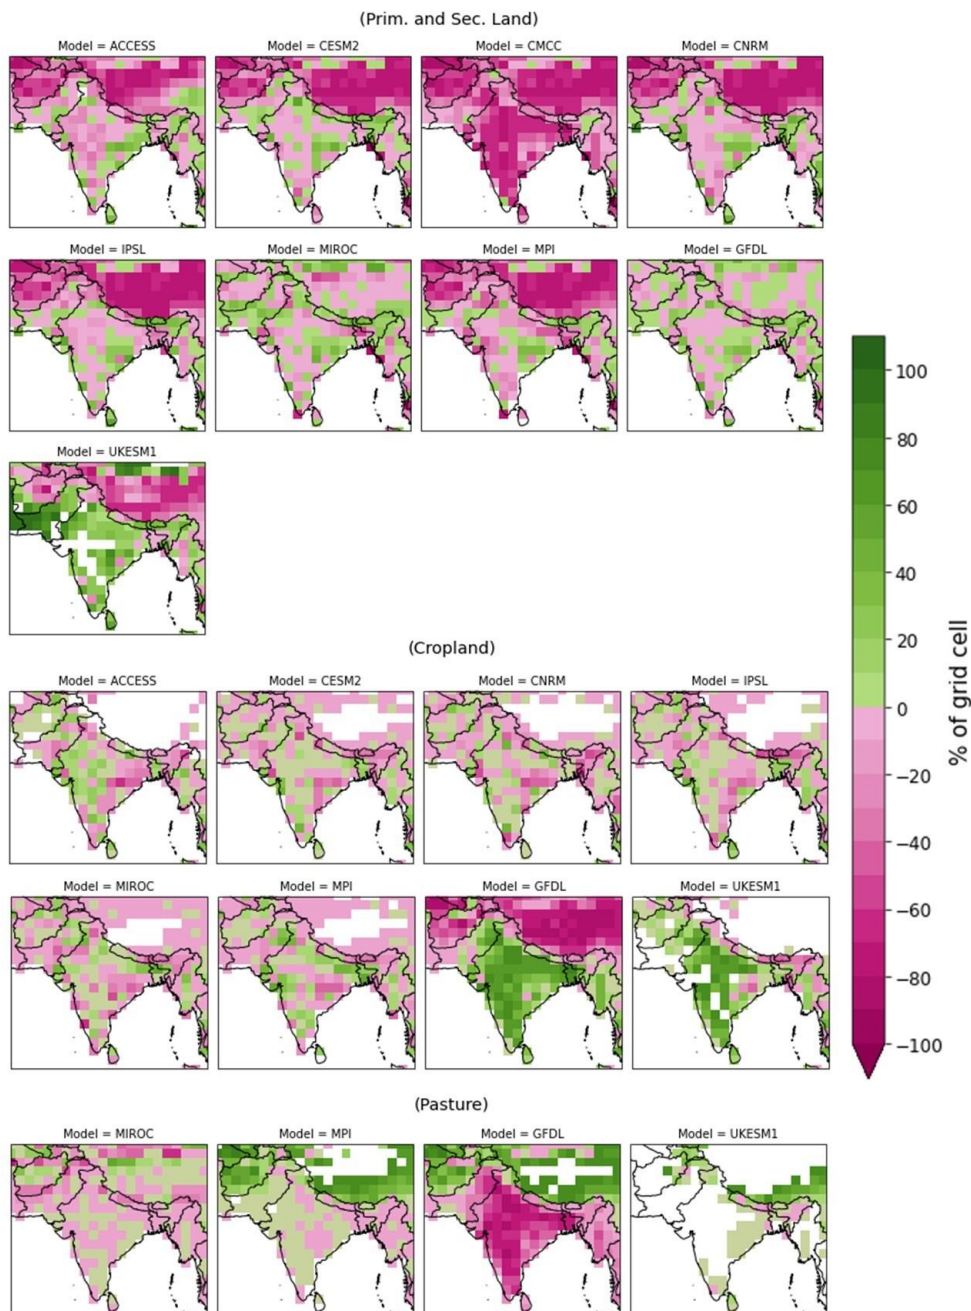

**Figure S1. Discrepancies from LUH2.** Discrepancies between historical experiments and the land use “states” taken from the land use forcing dataset (LUH2). Shades of green indicate that the historical experiments overestimate, relative to LUH2, certain land use class, and shades of pink show that historical experiments underestimated.

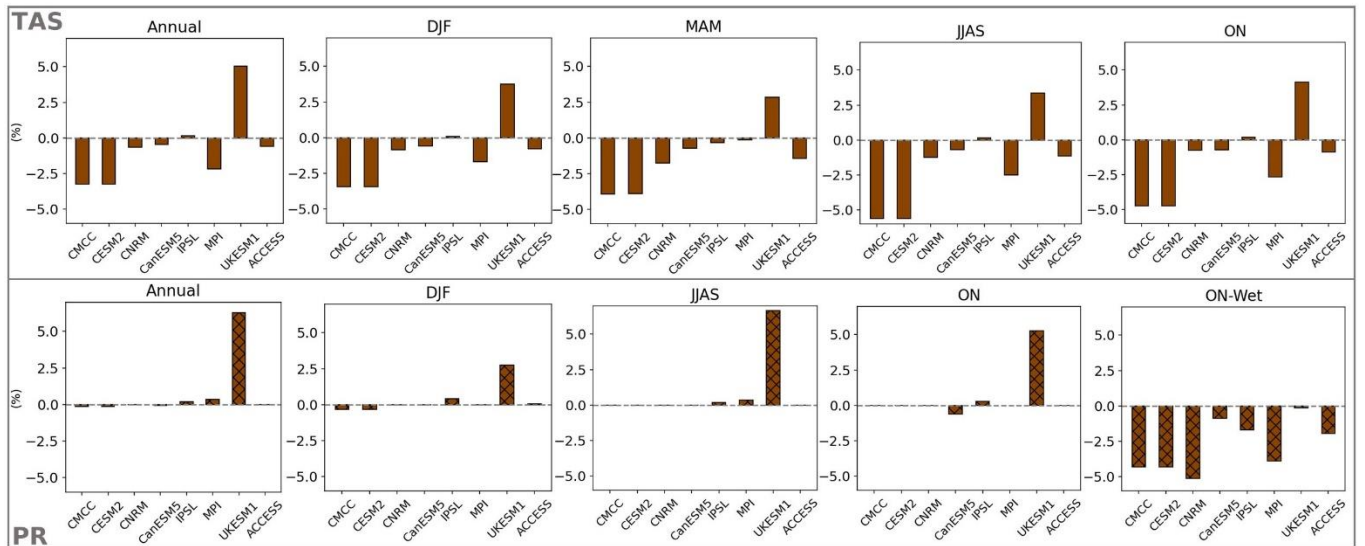

**Figure S2. Bare area changes.** Changes in bare area fraction taken from variable *baresoilFrac*. The values on the top are representatives of the spatial averages over the TAS robust grid cells for the respective seasons, whereas the hatched bar values on the bottom are for the PR robust grid cells.

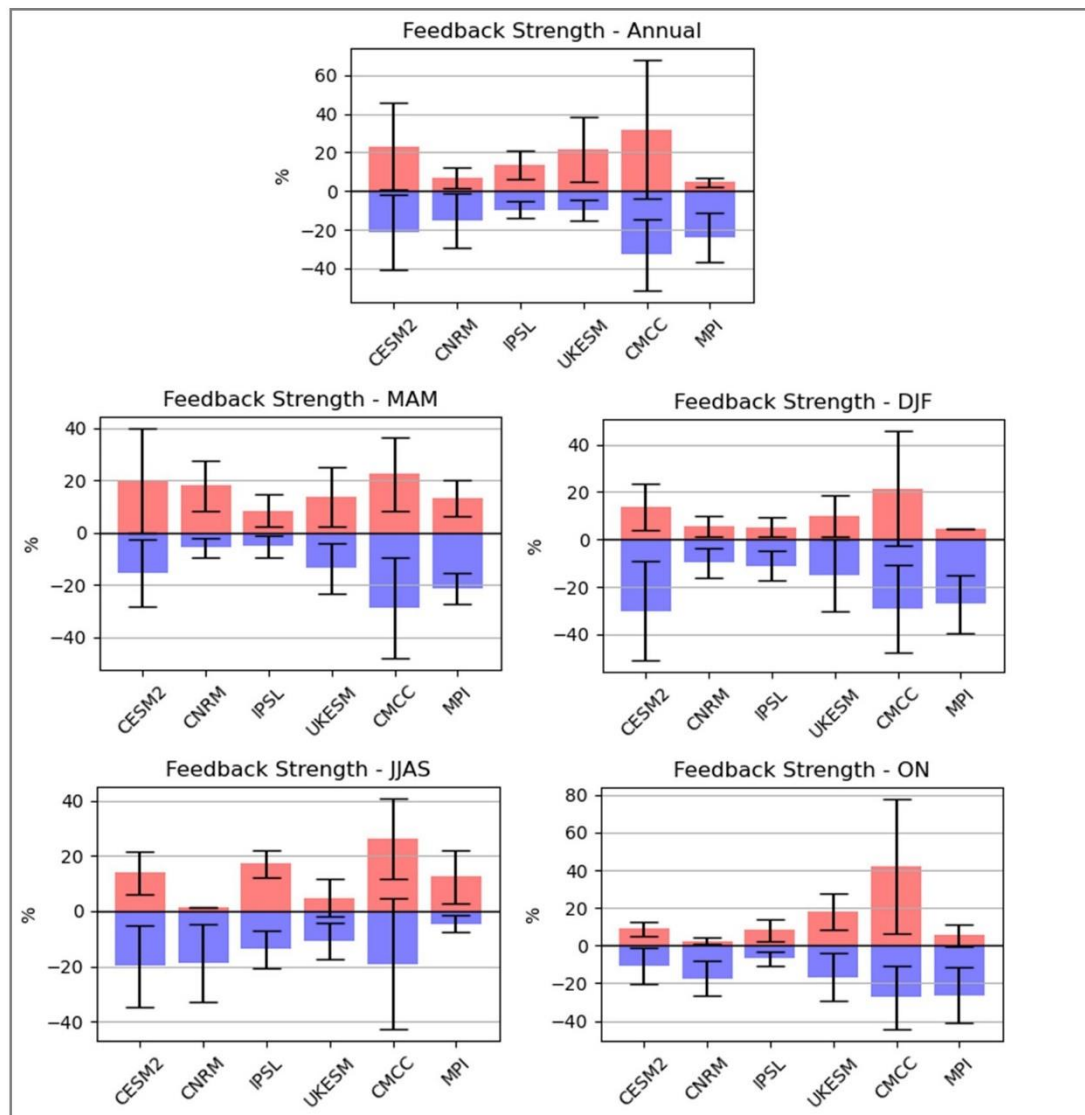

**Figure S3. Intermodel spread of the feedback strength.** Red bars indicate atmospheric feedback contribution to warming, and blue bars indicate atmospheric feedback contribution to cooling.
